# Supplementary material for: Exploring the Role of Physical Activity in Mediating the Association between Educational Level and Health-Related Quality of Life in an Adult Lifespan Sample from Madeira Island
Source: MDPI journal article supplement (doi:10.3390/ijerph19137608), 2022-06-22
Supplement: s1 [file s1]

## Supplementary material

### Tables

Table S1. Relationships between educational attainment (coded in 3 categories) and PA in health-related quality of life (N = 364).

| Pathways Model 1 key                                      | Indirect effect                | PM or PS    |
|-----------------------------------------------------------|--------------------------------|-------------|
| EDUC -> Total PA -> (outcome PCS)                         | -.0972 (95% CI -.1985, -.0203) | PS = -8.4%  |
| EDUC -> Total PA -> (outcome MCS)                         | -.1074 (95% CI -.2330, -.0141) | PS = -45.9% |
| EDUC -> Total PA -> (outcome Total SF 12 score)           | -.2046 (95% CI -.4243, -.0425) | PS = -14.8% |
| <b>Pathways Model 2 key</b>                               |                                |             |
| <b>Outcome PCS</b>                                        |                                |             |
| Total (model)                                             | .1358 (95% CI -.0583, .3307)   |             |
| EDUC->PA at work->PCS                                     | -.0035 (95% CI -.1396, .1113)  |             |
| EDUC->Sports PA->PCS                                      | .1796 (95% CI .0725, .3273)    | PM = 15.6%  |
| EDUC->Leisure-time PA->PCS                                | .0049 (95% CI -.0523, .0657)   |             |
| EDUC->PA at work->Sports PA->PCS                          | -.0445 (95% CI -.0922, -.0074) | PS = -3.9%  |
| EDUC->PA at work->Leisure-time PA->PCS                    | .0010 (95% CI -.0136, .0137)   |             |
| EDUC->Sports PA->Leisure-time PA->PCS                     | -.0024 (95% CI -.0305, .0231)  |             |
| EDUC->PA at work->Sports PA->Leisure-time PA->PCS         | .0006 (95% CI -.0063, .0079)   |             |
| <b>Outcome MCS</b>                                        |                                |             |
| Total (model)                                             | .0406 (95% CI -.2543, .3253)   |             |
| EDUC ->PA at work->MCS                                    | -.0024 (95% CI -.2129, .1944)  |             |
| EDUC->Sports PA->MCS                                      | .1174 (95% CI -.0023, .2723)   | PM = 50.2%  |
| EDUC->Leisure-time PA->MCS                                | -.0533 (95% CI -.1576, .0214)  |             |
| EDUC->PA at work->Sports PA->MCS                          | -.0291 (95% CI -.0749, .0006)  |             |
| EDUC->PA at work->Leisure-time PA->MCS                    | -.0113 (95% CI -.0411, .0053)  |             |
| EDUC->Sports PA->Leisure-time PA->MCS                     | .0256 (95% CI -.0094, .0807)   |             |
| EDUC->PA at work->Sports PA->Leisure-time PA->MCS         | -.0063 (95% CI -.0215, .0024)  |             |
| <b>Outcome SF-12 score</b>                                |                                |             |
| Total (model)                                             | .1764 (95% CI -.2102, .6083)   |             |
| EDUC->PA at work->SF-12 score                             | -.0059 (95% CI -.2907, .2956)  |             |
| EDUC->Sports PA->SF-12 score                              | .2970 (95% CI .1058, .5751)    | PM = 21.4%  |
| EDUC->Leisure-time PA->SF-12 score                        | .0484 (95% CI -.1670, .0719)   |             |
| EDUC->PA at work->Sports PA->SF-12 score                  | -.0736 (95% CI -.1730, -.0099) | PS = -5.3%  |
| EDUC->PA at work->Leisure-time PA->SF-12 score            | .0103 (95% CI -.0473, .0137)   |             |
| EDUC->Sports PA->Leisure-time PA->SF-12 score             | -.0232 (95% CI -.0309, .0881)  |             |
| EDUC->PA at work->Sports PA->Leisure-time PA->SF-12 score | .0058 (95% CI -.0253, .0082)   |             |

We show unstandardized regression coefficients (b) and bootstrap confidence intervals for the association. Education is codified into three levels: (1) < 3rd cycle of education, (2) secondary education, (3) higher education. PA is physical activity. PCS and MCS are Physical and Mental Component Summaries of SF-12. SF-12 score corresponds to the total score on the SF-12 scale. Proportion mediated (PM) or Proportion Suppressed (PS) represent the percentage of the total effect of Educational attainment on health-related quality of life by each pathway.

Table S2. Relationships between educational attainment and PA at work and total leisure-time PA (model 3) in health-related quality of life (N = 364).

| Pathways coding education in 8 categories            | Indirect effect                | PM or PS    |
|------------------------------------------------------|--------------------------------|-------------|
| <b>Outcome PCS</b>                                   |                                |             |
| Total (model)                                        | -.0048 (95% CI -.0870, .0740)  |             |
| EDUC->PA at work->PCS                                | -.0020 (95% CI -.0692, .0652)  |             |
| EDUC->Total leisure-time PA->PCS                     | .0189 (95% CI -.0314, .0735)   |             |
| EDUC->PA at work->Total leisure-time PA->PCS         | -.0217 (95% CI -.0445, -.0045) | PS = -3.4%  |
| <b>Outcome MCS</b>                                   |                                |             |
| Total (model)                                        | .0096 (95% CI -.1209, .1135)   |             |
| EDUC->PA at work->MCS                                | -.0066 (95% CI -.1149, .1042)  |             |
| EDUC->Total leisure-time PA->MCS                     | .0202 (95% CI -.0337, .0912)   |             |
| EDUC->PA at work->Total leisure-time PA->MCS         | -.0232 (95% CI -.0519, -.0043) | PS = -13.4% |
| <b>Outcome PCS</b>                                   |                                |             |
| Total (model)                                        | -.0144 (95% CI -.1909, .1720)  |             |
| EDUC->PA at work->SF-12 score                        | -.0087 (95% CI -.1587, .1472)  |             |
| EDUC->Total leisure-time PA->SF-12 score             | .0391 (95% CI -.0595, .1530)   |             |
| EDUC->PA at work->Total leisure-time PA->SF-12 score | -.0448 (95% CI -.0898, -.0100) | PS = -5.5%  |
| <b>Pathways coding education in 3 categories</b>     |                                |             |
| <b>Outcome PCS</b>                                   |                                |             |
| Total (model)                                        | .0107 (95% CI -.1564, .1552)   |             |
| EDUC->PA at work->PCS                                | -.0045 (95% CI -.1499, .1288)  |             |
| EDUC->Total leisure-time PA->PCS                     | .0570 (95% CI -.0326, .1487)   |             |
| EDUC->PA at work->Total leisure-time PA->PCS         | -.0418 (95% CI -.0850, -.0102) | PS = -3.6%  |
| <b>Outcome MCS</b>                                   |                                |             |
| Total (model)                                        | .0143 (95% CI -.2098, .2379)   |             |
| EDUC->PA at work->MCS                                | -.0026 (95% CI -.2161, .2037)  |             |
| EDUC->Total leisure-time PA->MCS                     | .0635 (95% CI -.0238, .1842)   |             |
| EDUC->PA at work->Total leisure-time PA->MCS         | -.0446 (95% CI -.1023, -.0081) | PS = -19.1% |
| <b>Outcome PCS</b>                                   |                                |             |
| Total (model)                                        | .0250 (95% CI -.3531, .3885)   |             |
| EDUC->PA at work->SF-12 score                        | -.0071 (95% CI -.3159, .3202)  |             |
| EDUC->Total leisure-time PA->SF-12 score             | .1205 (95% CI -.0506, .3510)   |             |
| EDUC->PA at work->Total leisure-time PA->SF-12 score | -.0884 (95% CI -.1802, -.0209) | PS = -6.4%  |

We show unstandardized regression coefficients (b) and bootstrap confidence intervals for the association. Education codified into three levels corresponds to: (1) < 3rd cycle of education, (2) secondary education, (3) higher education. PA is physical activity. PCS and MCS are Physical and Mental Component Summaries of SF-12. SF-12 score corresponds to the total score on the SF-12 scale. Proportion mediated (PM) or Proportion Suppressed (PS) represent the percentage of the total effect of Educational attainment on health-related quality of life by each pathway.

Table S3. Total and direct effects of educational attainment on health-related quality of life in the Madeiran population by age group.

**Madeiran population aged between 18 and 44 years old (N = 185)**

|                               | Coding education in 8 categories | Coding education in 3 categories  |
|-------------------------------|----------------------------------|-----------------------------------|
| <b>Total effect</b>           |                                  |                                   |
| EDUC -> (outcome PCS)         | .5538 (95% CI .2331, .8745) ***  | .9295 (95% CI .4473, 1.4117) ***  |
| EDUC -> (outcome MCS)         | .1367 (95% CI -.3413, .6148)     | .0669 (95% CI -.6578, .7916)      |
| EDUC -> (outcome SF-12 score) | .6905 (95% CI -.0056, 1.3897)    | .9964 (95% CI -.0591, 2.0519)     |
| <b>Direct effect</b>          |                                  |                                   |
| <b>Model 1</b>                |                                  |                                   |
| EDUC -> (outcome PCS)         | .6368 (95% CI .3102, .9634) ***  | 1.0286 (95% CI .5416, 1.5157) *** |
| EDUC -> (outcome MCS)         | .2535 (95% CI -.2340, .7411)     | .2038 (95% CI -.5296, .9372)      |
| EDUC -> (outcome SF-12 score) | .8904 (95% CI .1835, 1.5672) *   | 1.2324 (95% CI .1686, 2.2962) *   |
| <b>Model 2</b>                |                                  |                                   |
| EDUC -> (outcome PCS)         | .4138 (95% CI .0796, .7480) *    | .6142 (95% CI .1041, 1.1243) *    |
| EDUC -> (outcome MCS)         | .0779 (95% CI -.4474, .6032)     | -.1759 (95% CI -.9767, .6248)     |
| EDUC -> (outcome SF-12 score) | .4917 (95% CI -.2497, 1.2331)    | .4382 (95% CI -.6959, 1.5724)     |
| <b>Model 3</b>                |                                  |                                   |
| EDUC -> (outcome PCS)         | .5449 (95% CI .1949, .8949) **   | .9020 (95% CI .3811, 1.4230) ***  |
| EDUC -> (outcome MCS)         | .1740 (95% CI -.3504, .6984)     | .0596 (95% CI -.7266, .8457)      |
| EDUC -> (outcome SF-12 score) | .7189 (95% CI -.0396, 1.4774)    | .9616 (95% CI -.1765, 2.0997)     |

**Madeiran population ≥ 45 years old (N = 179)**

|                               |                                 |                                   |
|-------------------------------|---------------------------------|-----------------------------------|
| <b>Total effect</b>           |                                 |                                   |
| EDUC -> (outcome PCS)         | .6171 (95% CI .3114, .9197) *** | 1.2165 (95% CI .5652, 1.8678) *** |
| EDUC -> (outcome MCS)         | .0536 (95% CI -.3519, .4591)    | .0574 (95% CI -.8092, .9240)      |
| EDUC -> (outcome SF-12 score) | .6706 (95% CI .0351, 1.3062) *  | 1.2739 (95% CI -.0879, 2.6357)    |
| <b>Direct effect</b>          |                                 |                                   |
| <b>Model 1</b>                |                                 |                                   |
| EDUC -> (outcome PCS)         | .6809 (95% CI .3799, .9820) *** | 1.3228 (95% CI .6758, 1.9699) *** |
| EDUC -> (outcome MCS)         | .1095 (95% CI -.2987, .5176)    | .1546 (95% CI -.7147, 1.0238)     |
| EDUC -> (outcome SF-12 score) | .7904 (95% CI .1555, 1.4252) *  | 1.4774 (95% CI .1205, 2.8344)     |
| <b>Model 2</b>                |                                 |                                   |
| EDUC -> (outcome PCS)         | .6031 (95% CI .2894, .9167) *** | 1.1352 (95% CI .4617, 1.8088) **  |
| EDUC -> (outcome MCS)         | .0899 (95% CI -.3348, .5145)    | .0701 (95% CI -.8337, .9740)      |
| EDUC -> (outcome SF-12 score) | .6929 (95% CI .0322, 1.3537) *  | 1.2054 (95% CI -.2063, 2.6171)    |
| <b>Model 3</b>                |                                 |                                   |
| EDUC -> (outcome PCS)         | .6097 (95% CI .3020, .9175) *** | 1.564 (95% CI .5652, 1.8678) **   |
| EDUC -> (outcome MCS)         | .0352 (95% CI -.3838, .4542)    | -.0219 (95% CI -.9184, .8746)     |
| EDUC -> (outcome SF-12 score) | .6449 (95% CI -.0045, 1.2943)   | 1.1345 (95% CI -.2598, 2.5288)    |

We show unstandardized regression coefficients (b) and bootstrap confidence intervals for the association. Education codified into three levels corresponds to: (1) < 3rd cycle of education, (2) secondary education, (3) higher education. PCS and MCS are Physical and Mental Component Summaries of SF-12. SF-12 score corresponds to the total score on the SF-12 scale. \*P < .05, \*\*P ≤ .01, \*\*\* P < .001.

Table S4. Relationships between educational attainment and PA in health-related quality of life in the Madeiran population aged between 18 and 44 years old (N = 185).

| <b>Pathways Model 1 key</b>                               | <b>Indirect effect</b>         | <b>PM or PS</b> |
|-----------------------------------------------------------|--------------------------------|-----------------|
| EDUC -> Total PA -> (outcome PCS)                         | -.0830 (95% CI -.1893, -.0053) | PS = -14.10%    |
| EDUC -> Total PA -> (outcome MCS)                         | -.1168 (95% CI -.2741, -.0085) | PS = -85.44%    |
| EDUC -> Total PA -> (outcome SF-12 score)                 | -.1998 (95% CI -.4376, -.0330) | PS = -28.94%    |
| <b>Pathways Model 2 key</b>                               |                                |                 |
| <b>Outcome PCS</b>                                        |                                |                 |
| Total (model)                                             | .1400 (95% CI -.0517, .3219 )  |                 |
| EDUC->PA at work->PCS                                     | .0205 (95% CI -.1421, .1634)   |                 |
| EDUC->Sports PA->PCS                                      | .1282 (95% CI -.0110, .2804)   |                 |
| EDUC->Leisure-time PA->PCS                                | .0455 (95% CI -.0180, .1382)   |                 |
| EDUC->PA at work->Sports PA->PCS                          | -.0522 (95% CI -.1294, .0153)  |                 |
| EDUC->PA at work->Leisure-time PA->PCS                    | .0104 (95% CI -.0152, .0420)   |                 |
| EDUC->Sports PA->Leisure-time PA->PCS                     | -.0209 (95% CI -.0582, .0022)  |                 |
| EDUC->PA at work->Sports PA->Leisure-time PA->PCS         | .0085 (95% CI -.0021, .0278)   |                 |
| <b>Outcome MCS</b>                                        |                                |                 |
| Total (model)                                             | .0589 (95% CI -.2726, .4058)   |                 |
| EDUC ->PA at work->MCS                                    | -.0264 (95% CI -.3153, .2587)  |                 |
| EDUC->Sports PA->MCS                                      | .1120 (95% CI -.0099, .3042)   |                 |
| EDUC->Leisure-time PA->MCS                                | .0197 (95% CI -.0444, .1313)   |                 |
| EDUC->PA at work->Sports PA->MCS                          | -.0456 (95% CI -.1420, .0084)  |                 |
| EDUC->PA at work->Leisure-time PA->MCS                    | .0045 (95% CI -.0159, .0375)   |                 |
| EDUC->Sports PA->Leisure-time PA->MCS                     | -.0091 (95% CI -.0542, .0214)  |                 |
| EDUC->PA at work->Sports PA->Leisure-time PA->MCS         | .0037 (95% CI -.0097, .0234)   |                 |
| <b>Outcome SF-12 score</b>                                |                                |                 |
| Total (model)                                             | .1988 (95% CI -.2980, .7054)   |                 |
| EDUC->PA at work->SF-12 score                             | -.0060 (95% CI -.4120, .4092)  |                 |
| EDUC->Sports PA->SF-12 score                              | .2402 (95% CI -.0278, .5798)   |                 |
| EDUC->Leisure-time PA->SF-12 score                        | .0652 (95% CI -.0285, .2556)   |                 |
| EDUC->PA at work->Sports PA->SF-12 score                  | -.0978 (95% CI -.2695, .0147)  |                 |
| EDUC->PA at work->Leisure-time PA->SF-12 score            | .0150 (95% CI -.0264, .0736)   |                 |
| EDUC->Sports PA->Leisure-time PA->SF-12 score             | -.0300 (95% CI -.1057, .0085)  |                 |
| EDUC->PA at work->Sports PA->Leisure-time PA->SF-12 score | .0122 (95% CI -.0037, .0466)   |                 |

We show unstandardized regression coefficients (b) and bootstrap confidence intervals for the association. PA is physical activity. PCS and MCS are Physical and Mental Component Summaries of SF-12. SF-12 score corresponds to the total score on the SF-12 scale. Proportion mediated (PM) or Proportion Suppressed (PS) represent the percentage of the total effect of Educational attainment on health-related quality of life by each pathway.

Table S5. Relationships between educational attainment (coded in 3 categories) and PA in health-related quality of life in the Madeira population aged between 18 and 44 years old (N = 185).

| <b>Pathways Model 1 key</b>                               | <b>Indirect effect</b>         | <b>PM or PS</b> |
|-----------------------------------------------------------|--------------------------------|-----------------|
| EDUC -> Total PA -> (outcome PCS)                         | -.0991 (95% CI -.2402, -.0026) | PS = -10.7%     |
| EDUC -> Total PA -> (outcome MCS)                         | -.1368 (95% CI -.3600, .0054)  |                 |
| EDUC -> Total PA -> (outcome SF-12 score)                 | -.2360 (95% CI -.5718, -.0009) | PS = -23.7%     |
| <b>Pathways Model 2 key</b>                               |                                |                 |
| <b>Outcome PCS</b>                                        |                                |                 |
| Total (model)                                             | .3153 (95% CI .0175, .6283)    | PM = 33.9%      |
| EDUC->PA at work->PCS                                     | .0379 (95% CI -.1986, .2371)   |                 |
| EDUC->Sports PA->PCS                                      | .2892 (95% CI .0730, .5335)    | PM = 31.1%      |
| EDUC->Leisure-time PA->PCS                                | .0988 (95% CI -.0012, .2717)   |                 |
| EDUC->PA at work->Sports PA->PCS                          | -.0852 (95% CI -.2015, .0022)  |                 |
| EDUC->PA at work->Leisure-time PA->PCS                    | .0092 (95% CI -.0302, .0509)   |                 |
| EDUC->Sports PA->Leisure-time PA->PCS                     | -.0489 (95% CI -.1323, -.0005) | PS = -5.3%      |
| EDUC->PA at work->Sports PA->Leisure-time PA->PCS         | .0144 (95% CI -.0013, .0457)   |                 |
| <b>Outcome MCS</b>                                        |                                |                 |
| Total (model)                                             | .2429 (95% CI -.3119, .8094)   |                 |
| EDUC ->PA at work->MCS                                    | .0097 (95% CI -.4116, .4101)   |                 |
| EDUC->Sports PA->MCS                                      | .2759 (95% CI .0384, .5901)    | PM = 412.4%     |
| EDUC->Leisure-time PA->MCS                                | .0519 (95% CI -.0742, .2669)   |                 |
| EDUC->PA at work->Sports PA->MCS                          | -.0813 (95% CI -.2270, .0049)  |                 |
| EDUC->PA at work->Leisure-time PA->MCS                    | .0048 (95% CI -.0282, .0510)   |                 |
| EDUC->Sports PA->Leisure-time PA->MCS                     | -.0257 (95% CI -.1202, .0415)  |                 |
| EDUC->PA at work->Sports PA->Leisure-time PA->MCS         | .0076 (95% CI -.0152, .0439)   |                 |
| <b>Outcome SF-12 score</b>                                |                                |                 |
| Total (model)                                             | .5582 (95% CI -.2082, 1.3777)  |                 |
| EDUC->PA at work->SF-12 score                             | .0476 (95% CI -.5236, .5691)   |                 |
| EDUC->Sports PA->SF-12 score                              | .5651 (95% CI .1611, 1.0813)   | PM = 56.7%      |
| EDUC->Leisure-time PA->SF-12 score                        | .1508 (95% CI -.0237, .4731)   |                 |
| EDUC->PA at work->Sports PA->SF-12 score                  | -.1666 (95% CI -.4376, -.0009) | PS = -16.7%     |
| EDUC->PA at work->Leisure-time PA->SF-12 score            | .0140 (95% CI -.0498, .0844)   |                 |
| EDUC->Sports PA->Leisure-time PA->SF-12 score             | -.0746 (95% CI -.2248, .0161)  |                 |
| EDUC->PA at work->Sports PA->Leisure-time PA->SF-12 score | .0220 (95% CI -.0060, .0774)   |                 |

We show unstandardized regression coefficients (b) and bootstrap confidence intervals for the association. Education is codified into three levels: (1) < 3rd cycle of education, (2) secondary education, (3) higher education. PA is physical activity. PCS and MCS are Physical and Mental Component Summaries of SF-12. SF-12 score corresponds to the total score on the SF-12 scale. Proportion mediated (PM) or Proportion Suppressed (PS) represent the percentage of the total effect of Educational attainment on health-related quality of life by each pathway.

Table S6. Relationships between educational attainment and PA in health-related quality of life in the Madeiran population  $\geq 45$  years old (N = 179).

| Pathways Model 1 key                                      | Indirect effect                | PM or PS    |
|-----------------------------------------------------------|--------------------------------|-------------|
| EDUC -> Total PA -> (outcome PCS)                         | -.0639 (95% CI -.1636, -.0033) | PS = -10.4% |
| EDUC -> Total PA -> (outcome MCS)                         | -.0559 (95% CI -.1706, .0095)  |             |
| EDUC -> Total PA -> (outcome SF-12 score)                 | -.1197 (95% CI -.3139, .0042)  |             |
| Pathways Model 2 key                                      |                                |             |
| Outcome PCS                                               |                                |             |
| Total (model)                                             | .0140 (95% CI -.1325, .1638)   |             |
| EDUC->PA at work->PCS                                     | .0160 (95% CI -.0928, .1236)   |             |
| EDUC->Sports PA->PCS                                      | .0457 (95% CI -.0061, .1428)   |             |
| EDUC->Leisure-time PA->PCS                                | -.0350 (95% CI -.1188, .0100)  |             |
| EDUC->PA at work->Sports PA->PCS                          | -.0099 (95% CI -.0395, .0058)  |             |
| EDUC->PA at work->Leisure-time PA->PCS                    | -.0120 (95% CI -.0363, .0018)  |             |
| EDUC->Sports PA->Leisure-time PA->PCS                     | .0118 (95% CI -.0016, .0349)   |             |
| EDUC->PA at work->Sports PA->Leisure-time PA->PCS         | -.0026 (95% CI -.0115, .0013)  |             |
| Outcome MCS                                               |                                |             |
| Total (model)                                             | -.0363 (95% CI -.2272, .1374)  |             |
| EDUC ->PA at work->MCS                                    | .0333 (95% CI -.1184, .1671)   |             |
| EDUC->Sports PA->MCS                                      | .0056 (95% CI -.0677, .0931)   |             |
| EDUC->Leisure-time PA->MCS                                | -.0685 (95% CI -.1922, .0116)  |             |
| EDUC->PA at work->Sports PA->MCS                          | -.0012 (95% CI -.0252, .0153)  |             |
| EDUC->PA at work->Leisure-time PA->MCS                    | -.0235 (95% CI -.0573, .0020)  |             |
| EDUC->Sports PA->Leisure-time PA->MCS                     | .0230 (95% CI -.0047, .0776)   |             |
| EDUC->PA at work->Sports PA->Leisure-time PA->MCS         | -.0050 (95% CI -.0189, .0025)  |             |
| Outcome SF-12 score                                       |                                |             |
| Total (model)                                             | -.0223 (95% CI -.3560, .2698)  |             |
| EDUC->PA at work->SF-12 score                             | .0493 (95% CI -.1822, .2694)   |             |
| EDUC->Sports PA->SF-12 score                              | .0513 (95% CI -.0450, .2289)   |             |
| EDUC->Leisure-time PA->SF-12 score                        | -.1035 (95% CI -.2941, .0130)  |             |
| EDUC->PA at work->Sports PA->SF-12 score                  | -.0112 (95% CI -.0635, .0120)  |             |
| EDUC->PA at work->Leisure-time PA->SF-12 score            | -.0354 (95% CI -.0922, .0038)  |             |
| EDUC->Sports PA->Leisure-time PA->SF-12 score             | .0348 (95% CI -.0083, .1069)   |             |
| EDUC->PA at work->Sports PA->Leisure-time PA->SF-12 score | -.0076 (95% CI -.0256, .0040)  |             |

We show unstandardized regression coefficients (b) and bootstrap confidence intervals for the association.. PA is physical activity. PCS and MCS are Physical and Mental Component Summaries of SF-12. SF-12 score corresponds to the total score on the SF-12 scale. Proportion mediated (PM) or Proportion Suppressed (PS) represent the percentage of the total effect of Educational attainment on health-related quality of life by each pathway.

Table S7. Relationships between educational attainment (coded in 3 categories) and PA in health-related quality of life in the Ma-deiran population  $\geq 45$  years old (N = 179).

| <b>Pathways Model 1 key</b>                               | <b>Indirect effect</b>        | <b>PM or PS</b> |
|-----------------------------------------------------------|-------------------------------|-----------------|
| EDUC -> Total PA -> (outcome PCS)                         | -.1064 (95% CI -.2948, .0049) |                 |
| EDUC -> Total PA -> (outcome MCS)                         | -.0972 (95% CI -.3088, .0341) |                 |
| EDUC -> Total PA -> (outcome SF-12 score)                 | -.2035 (95% CI -.5806, .0359) |                 |
| <b>Pathways Model 2 key</b>                               |                               |                 |
| <b>Outcome PCS</b>                                        |                               |                 |
| Total (model)                                             | .0812 (95% CI -.2346, .3918)  |                 |
| EDUC->PA at work->PCS                                     | .0428 (95% CI -.1859, .2712)  |                 |
| EDUC->Sports PA->PCS                                      | .1085 (95% CI -.0197, .3099)  |                 |
| EDUC->Leisure-time PA->PCS                                | -.0416 (95% CI -.1930, .0351) |                 |
| EDUC->PA at work->Sports PA->PCS                          | -.0225 (95% CI -.0854, .0109) |                 |
| EDUC->PA at work->Leisure-time PA->PCS                    | -.0242 (95% CI -.0757, .0048) |                 |
| EDUC->Sports PA->Leisure-time PA->PCS                     | .0230 (95% CI -.0039, .0747)  |                 |
| EDUC->PA at work->Sports PA->Leisure-time PA->PCS         | -.0048 (95% CI -.0202, .0029) |                 |
| <b>Outcome MCS</b>                                        |                               |                 |
| Total (model)                                             | -.0127 (95% CI -.4283, .3787) |                 |
| EDUC->PA at work->MCS                                     | .0796 (95% CI -.2251, .3865)  |                 |
| EDUC->Sports PA->MCS                                      | .0156 (95% CI -.1441, .1989)  |                 |
| EDUC->Leisure-time PA->MCS                                | -.0915 (95% CI -.3382, .0665) |                 |
| EDUC->PA at work->Sports PA->MCS                          | -.0032 (95% CI -.0483, .0303) |                 |
| EDUC->PA at work->Leisure-time PA->MCS                    | -.0533 (95% CI -.1297, .0028) |                 |
| EDUC->Sports PA->Leisure-time PA->MCS                     | .0506 (95% CI -.0073, .1464)  |                 |
| EDUC->PA at work->Sports PA->Leisure-time PA->MCS         | -.0105 (95% CI -.0433, .0055) |                 |
| <b>Outcome SF-12 score</b>                                |                               |                 |
| Total (model)                                             | .0685 (95% CI -.5645, .6476)  |                 |
| EDUC->PA at work->SF-12 score                             | .1225 (95% CI -.3753, .6064)  |                 |
| EDUC->Sports PA->SF-12 score                              | .1241 (95% CI -.1037, .4590)  |                 |
| EDUC->Leisure-time PA->SF-12 score                        | -.1331 (95% CI -.4802, .0833) |                 |
| EDUC->PA at work->Sports PA->SF-12 score                  | -.0258 (95% CI -.1400, .0281) |                 |
| EDUC->PA at work->Leisure-time PA->SF-12 score            | -.0775 (95% CI -.1961, .0059) |                 |
| EDUC->Sports PA->Leisure-time PA->SF-12 score             | .0736 (95% CI -.0096, .2150)  |                 |
| EDUC->PA at work->Sports PA->Leisure-time PA->SF-12 score | -.0153 (95% CI -.0595, .0079) |                 |

We show unstandardized regression coefficients (b) and bootstrap confidence intervals for the association. Education is codified into three levels: (1) < 3rd cycle of education, (2) secondary education, (3) higher education. PA is physical activity. PCS and MCS are Physical and Mental Component Summaries of SF-12. SF-12 score corresponds to the total score on the SF-12 scale. Proportion mediated (PM) or Proportion Suppressed (PS) represent the percentage of the total effect of Educational attainment on health-related quality of life by each pathway.

Table S8. Relationships between educational attainment and PA at work and total leisure-time PA (model 3) in health-related quality of life in the Madeiran population aged between 18 and 44 years old (N = 185).

| Pathways coding education in 8 categories            | Indirect effect               | PM or PS |
|------------------------------------------------------|-------------------------------|----------|
| <b>Outcome PCS</b>                                   |                               |          |
| Total (model)                                        | .0089 (95% CI -.1714, .1705)  |          |
| EDUC->PA at work->PCS                                | .0136 (95% CI -.1597, .1525)  |          |
| EDUC->Total leisure-time PA->PCS                     | .0217 (95% CI -.0506, .1063)  |          |
| EDUC->PA at work->Total leisure-time PA->PCS         | .0207 (95% CI -.0764, .0050)  |          |
| <b>Outcome MCS</b>                                   |                               |          |
| Total (model)                                        | -.0372 (95% CI -.3426, .2542) |          |
| EDUC->PA at work->MCS                                | -.0315 (95% CI -.3300, .2434) |          |
| EDUC->Total leisure-time PA->MCS                     | .0266 (95% CI -.0566, .1401)  |          |
| EDUC->PA at work->Total leisure-time PA->MCS         | -.0323 (95% CI -.0960, .0050) |          |
| <b>Outcome PCS</b>                                   |                               |          |
| Total (model)                                        | -.0284 (95% CI -.4931, .4231) |          |
| EDUC->PA at work->SF-12 score                        | -.0179 (95% CI -.4327, .3829) |          |
| EDUC->Total leisure-time PA->SF-12 score             | .0483 (95% CI -.1162, .2206)  |          |
| EDUC->PA at work->Total leisure-time PA->SF-12 score | -.0587 (95% CI -.1724, .0132) |          |
| <b>Pathways coding education in 3 categories</b>     |                               |          |
| <b>Outcome PCS</b>                                   |                               |          |
| Total (model)                                        | .0275 (95% CI -.2688, .2676)  |          |
| EDUC->PA at work->PCS                                | .0146 (95% CI -.2475, .2140)  |          |
| EDUC->Total leisure-time PA->PCS                     | .0512 (95% CI -.0373, .1771)  |          |
| EDUC->PA at work->Total leisure-time PA->PCS         | -.0384 (95% CI -.1192, .0054) |          |
| <b>Outcome MCS</b>                                   |                               |          |
| Total (model)                                        | .0074 (95% CI -.4091, .4034)  |          |
| EDUC->PA at work->MCS                                | -.0094 (95% CI -.3958, .3727) |          |
| EDUC->Total leisure-time PA->MCS                     | .0666 (95% CI -.0597, .2431)  |          |
| EDUC->PA at work->Total leisure-time PA->MCS         | -.0499 (95% CI -.1549, .0050) |          |
| <b>Outcome PCS</b>                                   |                               |          |
| Total (model)                                        | .0348 (95% CI -.5457, .6057)  |          |
| EDUC->PA at work->SF-12 score                        | .0053 (95% CI -.5516, .5322)  |          |
| EDUC->Total leisure-time PA->SF-12 score             | .1179 (95% CI -.0910, .3779)  |          |
| EDUC->PA at work->Total leisure-time PA->SF-12 score | -.0883 (95% CI -.2496, .0036) |          |

We show unstandardized regression coefficients (b) and bootstrap confidence intervals for the association. Education codified into three levels corresponds to: (1) < 3rd cycle of education, (2) secondary education, (3) higher education. PA is physical activity. PCS and MCS are Physical and Mental Component Summaries of SF-12. SF-12 score corresponds to the total score on the SF-12 scale. Proportion mediated (PM) or Proportion Suppressed (PS) represent the percentage of the total effect of Educational attainment on health-related quality of life by each pathway.



Table S9. Relationships between educational attainment and PA at work and total leisure-time PA (model 3) in health-related quality of life in the Madeiran population  $\geq 45$  years old (N = 179).

| Pathways coding education in 8 categories            | Indirect effect                | PM or PS   |
|------------------------------------------------------|--------------------------------|------------|
| <b>Outcome PCS</b>                                   |                                |            |
| Total (model)                                        | .0073 (95% CI -.1190, .1322)   |            |
| EDUC->PA at work->PCS                                | .0167(95% CI -.0869, .1184)    |            |
| EDUC->Total leisure-time PA->PCS                     | .0158 (95% CI -.0770, .1106)   |            |
| EDUC->PA at work->Total leisure-time PA->PCS         | -.0252 (95% CI -.0661, -.0002) | PS = -4.1% |
| <b>Outcome MCS</b>                                   |                                |            |
| Total (model)                                        | .0184 (95% CI -.1324, .1712)   |            |
| EDUC->PA at work->MCS                                | .0272 (95% CI -.1131, .1669)   |            |
| EDUC->Total leisure-time PA->MCS                     | .0148 (95% CI -.0661, .1194)   |            |
| EDUC->PA at work->Total leisure-time PA->MCS         | -.0236 (95% CI -.0607, .0015)  |            |
| <b>Outcome PCS</b>                                   |                                |            |
| Total (model)                                        | .0257 (95% CI -.2354, .2832)   |            |
| EDUC->PA at work->SF-12 score                        | .0439 (95% CI -.1856, .2689)   |            |
| EDUC->Total leisure-time PA->SF-12 score             | .0306 (95% CI -.1399, .1931)   |            |
| EDUC->PA at work->Total leisure-time PA->SF-12 score | -.0488 (95% CI -.1267, -.0006) | PS = -7.6% |
| <b>Pathways coding education in 3 categories</b>     |                                |            |
| <b>Outcome PCS</b>                                   |                                |            |
| Total (model)                                        | .0601 (95% CI -.2177, .3332)   |            |
| EDUC->PA at work->PCS                                | .0461(95% CI -.1856, .2736)    |            |
| EDUC->Total leisure-time PA->PCS                     | .0688 (95% CI -.1015, .2431)   |            |
| EDUC->PA at work->Total leisure-time PA->PCS         | -.0547 (95% CI -.1289, -.0033) | PS = -4.5% |
| <b>Outcome MCS</b>                                   |                                |            |
| Total (model)                                        | .0793 (95% CI -.2713, .4056)   |            |
| EDUC->PA at work->MCS                                | .0656 (95% CI -.2377, .3601)   |            |
| EDUC->Total leisure-time PA->MCS                     | .0667 (95% CI -.0925, .2955)   |            |
| EDUC->PA at work->Total leisure-time PA->MCS         | -.0530 (95% CI -.1303, .0027)  |            |
| <b>Outcome PCS</b>                                   |                                |            |
| Total (model)                                        | .1394 (95% CI -.4550, .6543)   |            |
| EDUC->PA at work->SF-12 score                        | .1117 (95% CI -.3904, .5736)   |            |
| EDUC->Total leisure-time PA->SF-12 score             | .1355 (95% CI -.2151, .5269)   |            |
| EDUC->PA at work->Total leisure-time PA->SF-12 score | -.1078 (95% CI -.2487, -.0003) | PS = -9.5% |

We show unstandardized regression coefficients (b) and bootstrap confidence intervals for the association. Education codified into three levels corresponds to: (1) < 3rd cycle of education, (2) secondary education, (3) higher education. PA is physical activity. PCS and MCS are Physical and Mental Component Summaries of SF-12. SF-12 score corresponds to the total score on the SF-12 scale. Proportion mediated (PM) or Proportion Suppressed (PS) represent the percentage of the total effect of Educational attainment on health-related quality of life by each pathway.

## Figures

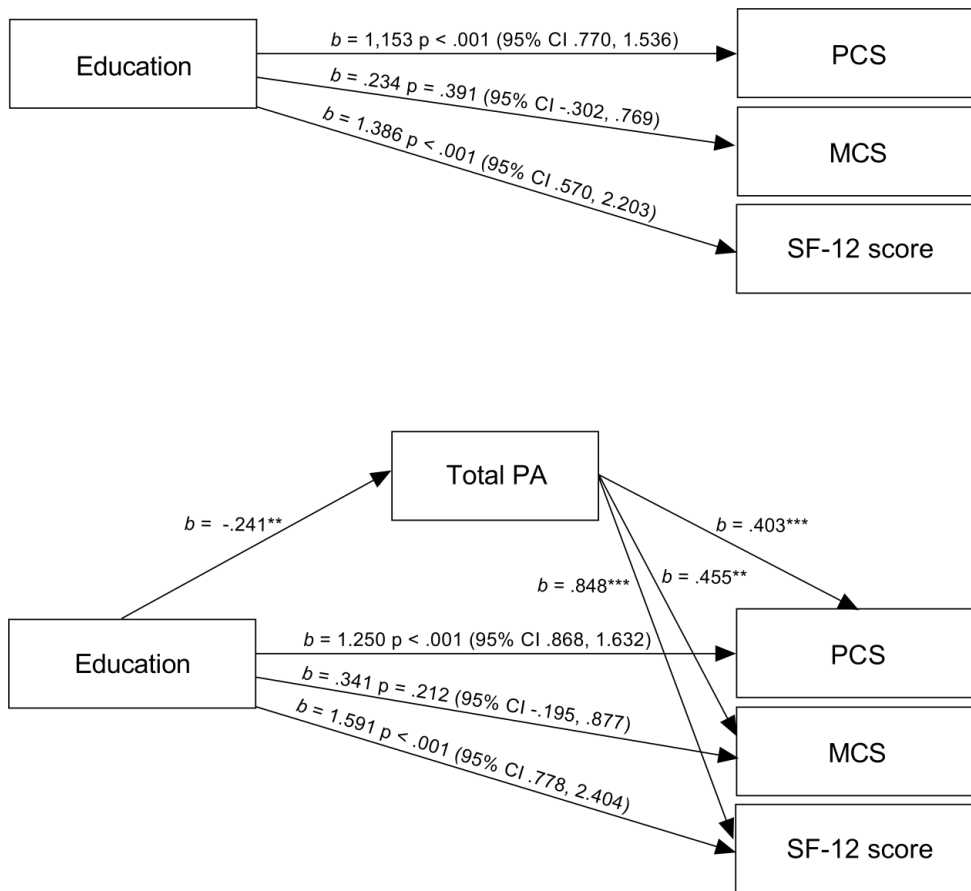

**Figure S1. Relationships between educational attainment (coded in 3 categories) and total physical activity in health-related quality of life (N = 364).** We show unstandardized regression coefficients ( $b$ ) and bootstrap confidence intervals for the association. Education is codified into three levels: (1) < 3rd cycle of education, (2) secondary education, (3) higher education. PA is physical activity. PCS and MCS are Physical and Mental Component Summaries of SF-12. SF-12 score corresponds to the total score on the SF-12 scale.  $^{**}P \leq .01$ ,  $^{***}P < .001$ .

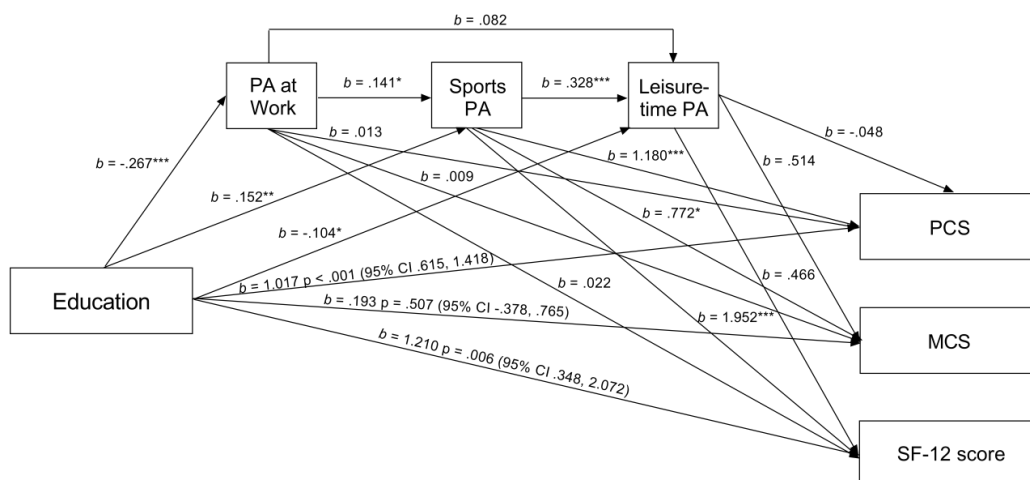

**Figure S2. Relationships between educational attainment (coded in 3 categories) and work, sports and leisure physical activity in health-related quality of life (N = 364).** We show unstandardized regression coefficients ( $b$ ) and bootstrap confidence intervals for the association. Education is codified into three levels: (1) < 3rd cycle of education, (2) secondary education, (3) higher education. PA is physical activity. PCS and MCS are Physical and Mental Component Summaries of SF-12. SF-12 score corresponds to the total score on the SF-12 scale.  $^{*}P < .05$ ,  $^{**}P \leq .01$ ,  $^{***}P < .001$

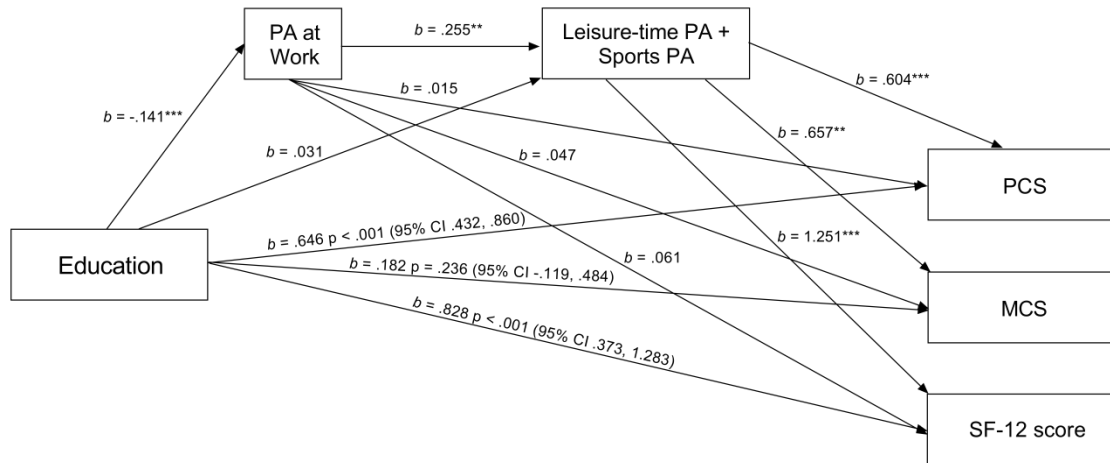

**Figure S3. Relationships between educational attainment and work and total leisure-time physical activity in health-related quality of life (N = 364).** We show unstandardized regression coefficients (b) and bootstrap confidence intervals for the association. Education is coded into eight levels: (1) no education; (2) 1st cycle; (3) 2nd cycle; (4) 3rd cycle; (5) secondary school level; (6) Bachelor Degree; (7) Master Degree; or (8) PhD. PA is physical activity. PCS and MCS are Physical and Mental Component Summaries of SF-12. SF-12 score corresponds to the total score on the SF-12 scale.  $**P \leq .01$ ,  $***P < .001$

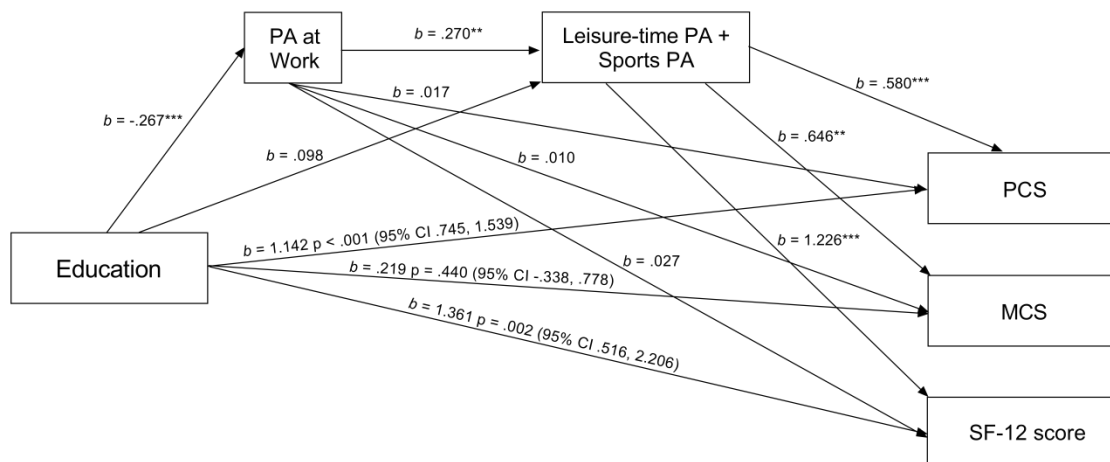

**Figure S4. Relationships between educational attainment (coded in 3 categories) and work and total leisure-time physical activity in health-related quality of life (N = 364).** We show unstandardized regression coefficients (b) and bootstrap confidence intervals for the association. Education is codified into three levels: (1) < 3rd cycle of education, (2) secondary education, (3) higher education. PA is physical activity. PCS and MCS are Physical and Mental Component Summaries of SF-12. SF-12 score corresponds to the total score on the SF-12 scale.  $**P \leq .01$ ,  $***P < .001$ .
